# Supplementary material
Source: publisher site journal article supplement (https://www.dovepress.com/article/supplementary_file/585297/585297%20Revised%20appendix.docx)
Supplement: Supplementary file 1 [file 585297%20Revised%20appendix.docx]

**Appendix**

**Appendix 1 - Sample search strategy**

Embase <1980 to 2025 Week 22>

1 (health professional* or nurs* or doctor* or physician* or allied health or pharmac*).mp. 6473208

2 ((health* or care) adj2 leader*).mp. 8921

3 ((health* or care) adj2 manager*).mp. 9725

4 exp health personnel/ 2157237

5 1 or 2 or 3 or 4 7556596

6 leader*.mp. 172109

7 exp leadership/ 99165

8 6 or 7 172109

9 (train* or program* or develop* or educat* or learn*).mp. 11743130

10 exp education, professional/ 11586

11 9 or 10 11743130

12 (NHS or National Health Service or United Kingdom or UK or Great Britain or England or Scotland or Wales or Northern Ireland).ti,ab,in. 3468741

13 compassion*.mp. 27287

14 5 and 8 and 11 and 12 and 13 173

15 limit 14 to yr="2013 -Current" 154

16 limit 15 to english language 154
